# Supplementary material for: MPR 1.0: A stand-alone Multiscale Parameter Regionalization Tool for Improved Parameter Estimation of Land Surface Models
Source: Copernicus journal article supplement (doi:10.5194/gmd-2021-103), 2021-05-26

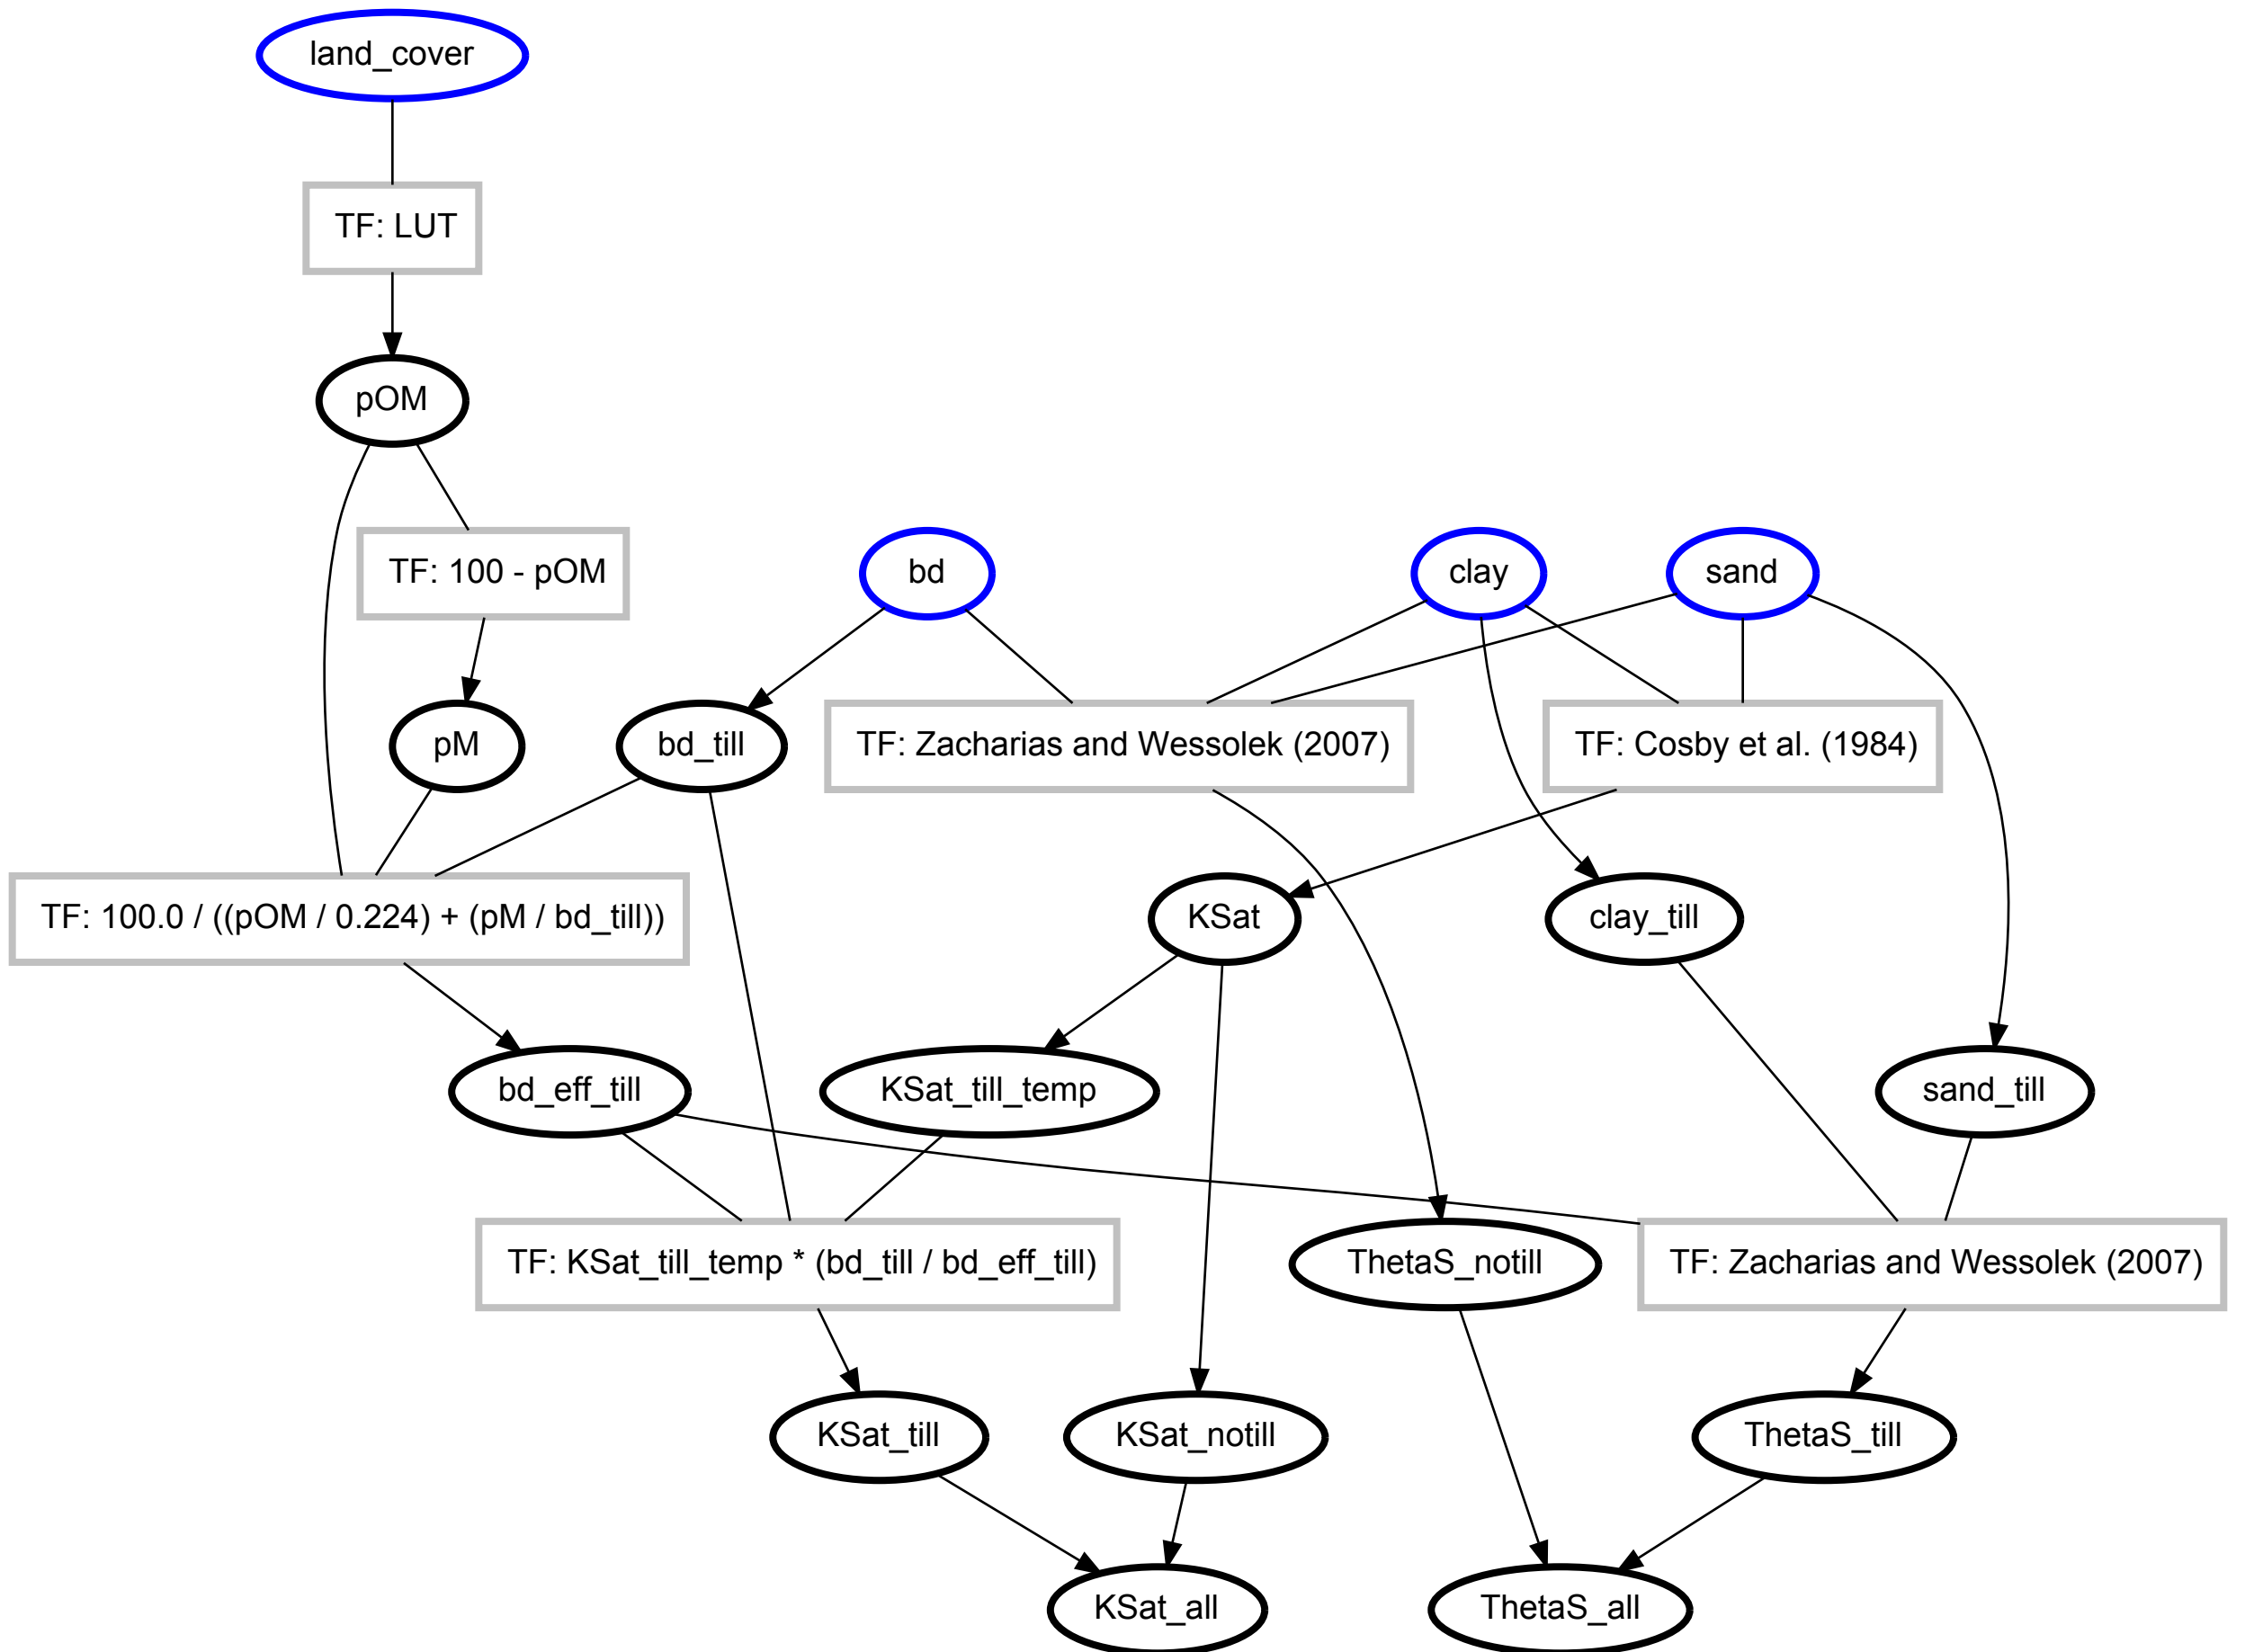

Supplement: Supplementary file [file gmd-2021-103-AC3-supplement.pdf]
